# Supplementary material for: A multifunctional cobalt iron sulfide electrocatalyst for high performance Zn–air batteries and overall water splitting
Source: Royal Society of Chemistry journal article supplement (doi:10.1039/d1ta10018a), 2022-01-01
Supplement: d1ta10018a1.pdf [file d1ta10018a1.pdf]

## SUPPORTING INFORMATION

### Multifunctional cobalt iron sulfide electrocatalyst for high performance Zn-air battery and overall water splitting

Mukesh Kumar and Tharamani C. Nagaiah\*

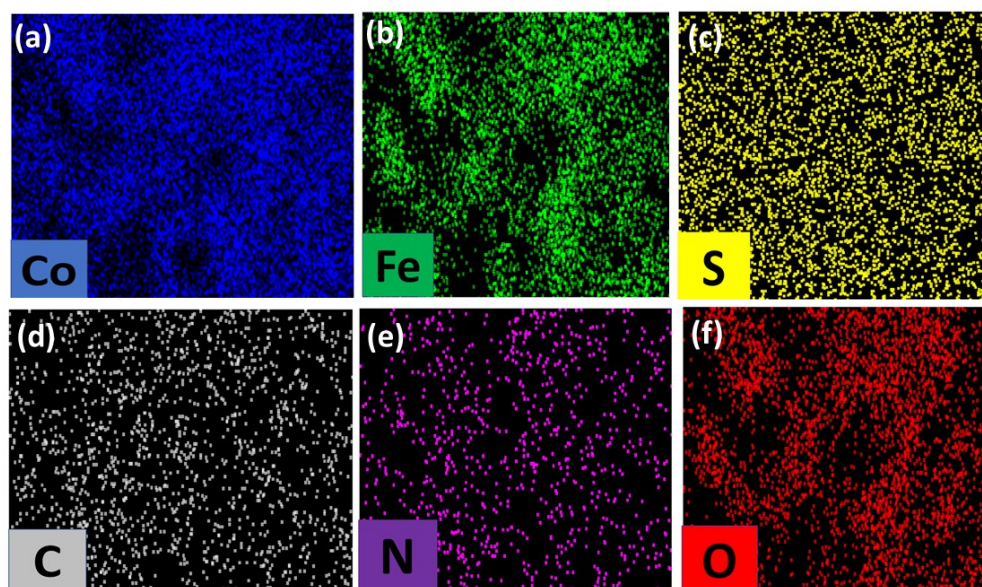

**Fig. S1.** Elemental dot mapping images representing the distribution of (a) cobalt, (b) iron, (c) sulfur, (d) carbon, (e) nitrogen and (f) oxygen in CoFe(3:1)S<sub>2</sub> catalyst.

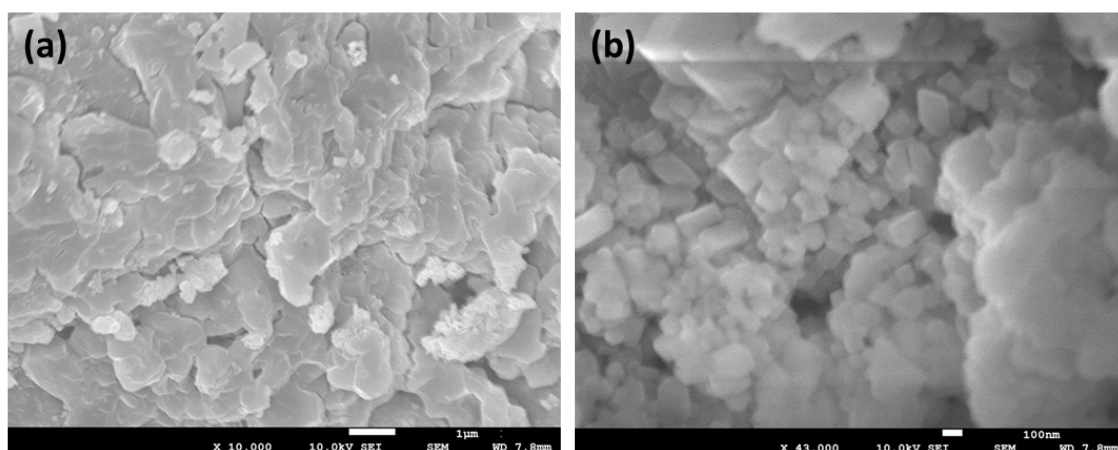

**Fig. S2.** FE-SEM images of (a) FeS<sub>2</sub> and (b) CoS<sub>2</sub> catalysts.

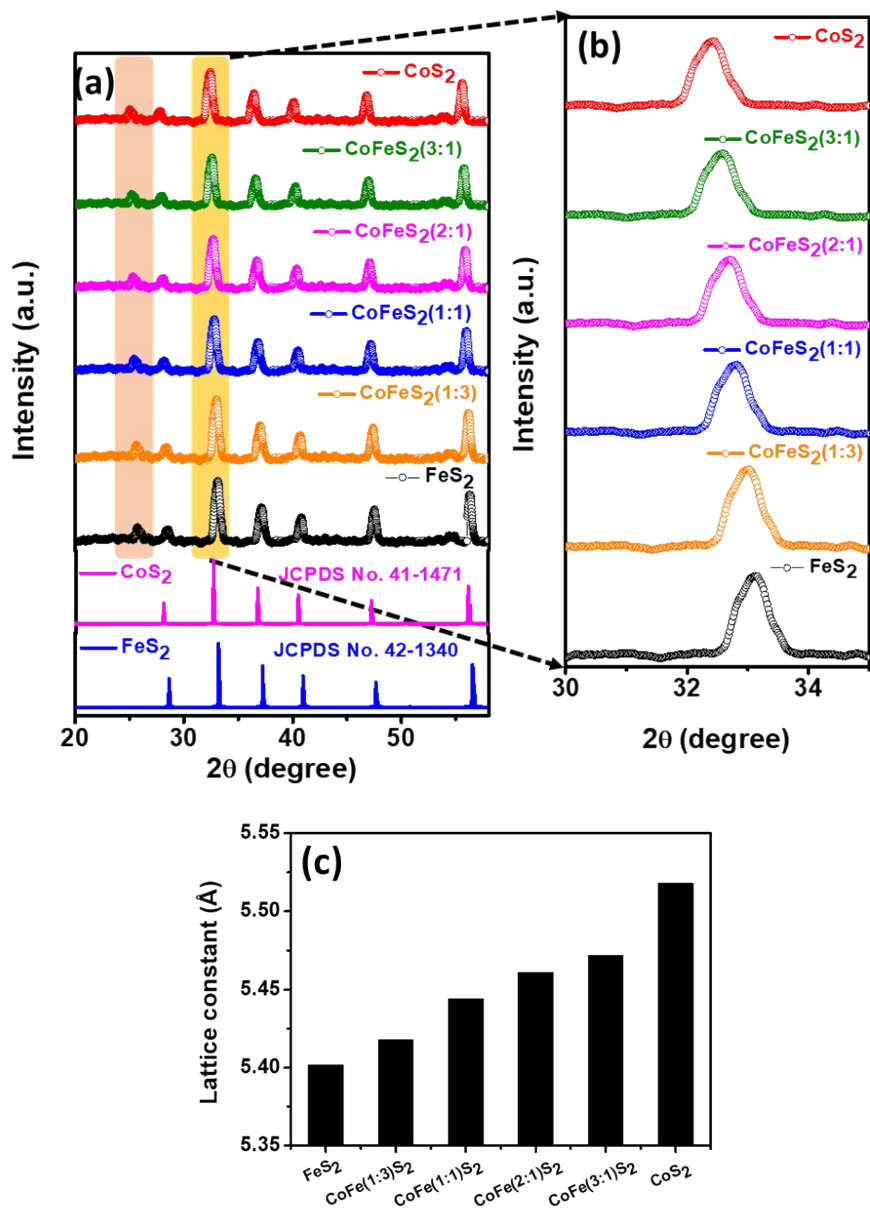

**Fig. S3.** (a) and (b) XRD pattern of various catalysts and (c) bar diagram representing the average lattice constant of different catalysts.

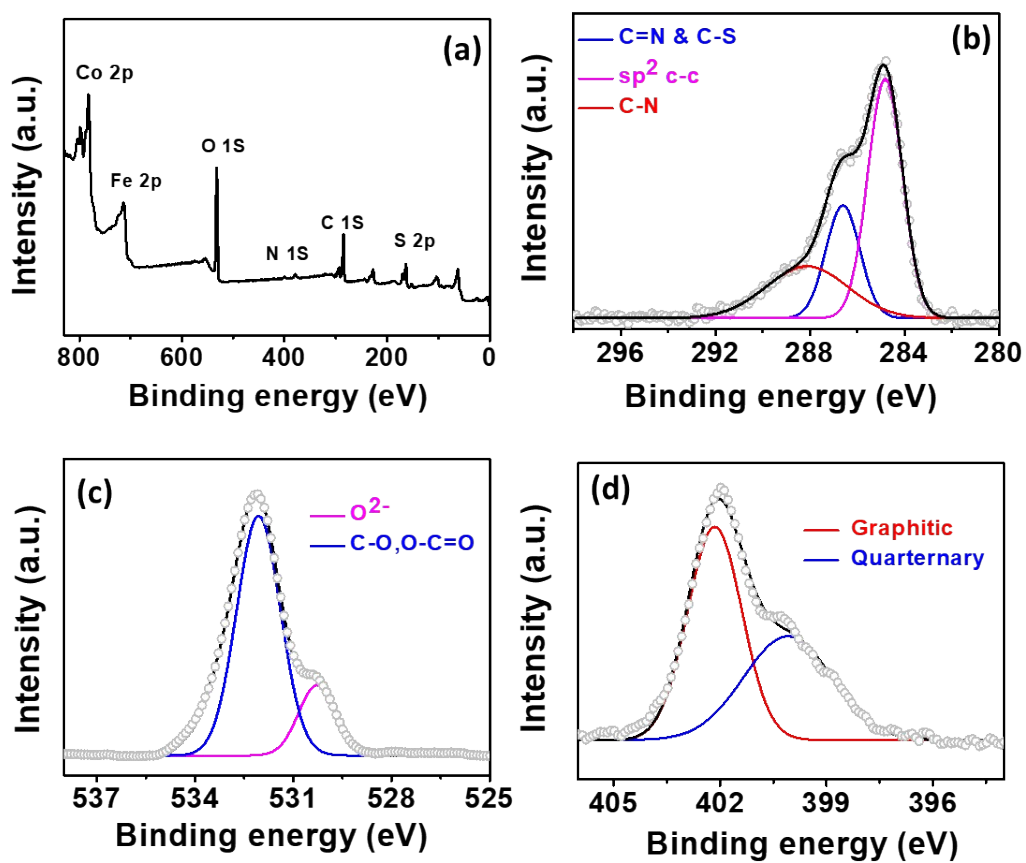

**Fig. S4.** (a) XPS survey spectrum and deconvoluted XP spectra of (b) C 1s, (c) O 1s, and (d) N 1s, of CoFe(3:1)S<sub>2</sub> catalyst.

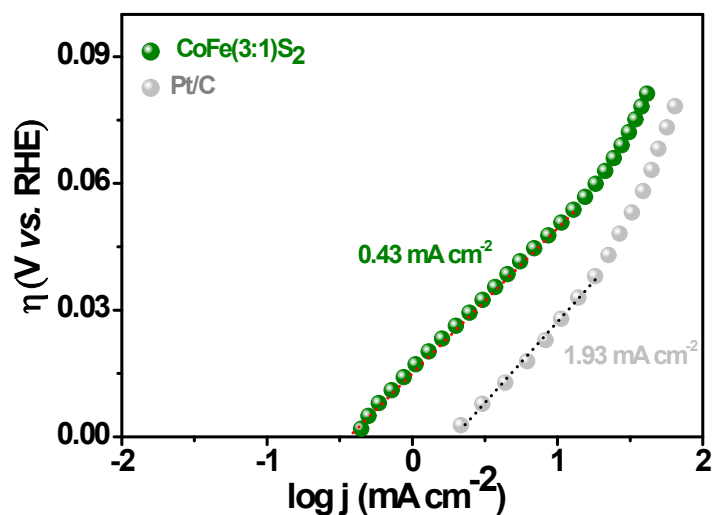

**Fig. S5.** Exchange current density for CoFe(3:1)S<sub>2</sub> and Pt/C obtained by extrapolating Tafel slope.

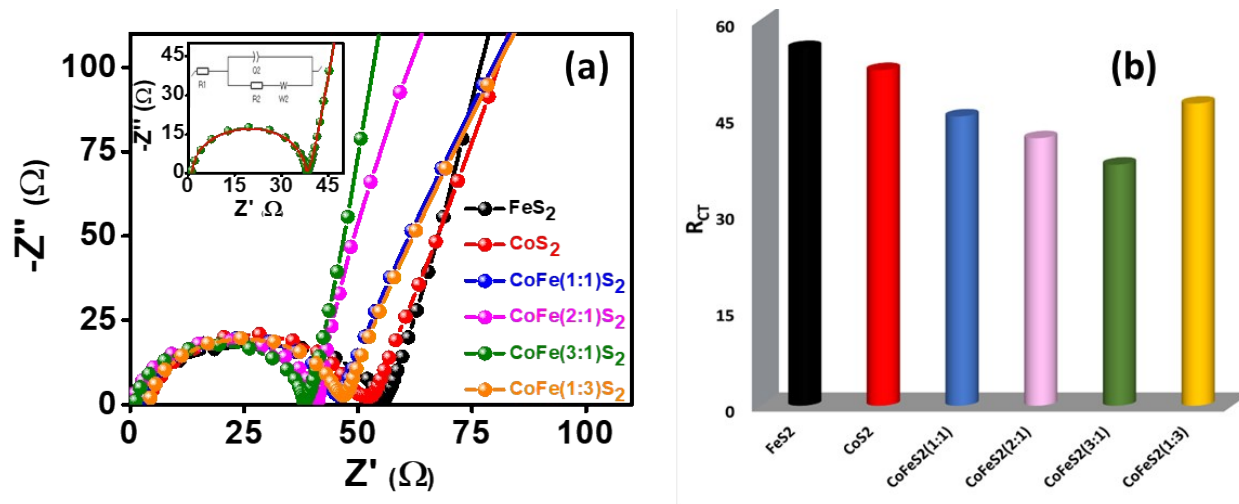

**Fig. S6.** (a) EIS (b) corresponding charge transfer resistance extracted from Nyquist plot of various catalyst in 0.5 M  $\text{H}_2\text{SO}_4$  electrolyte, CE: Pt wire, RE: SCE.

**Table S1: Electrochemical Impedance analysis extracted from Fig. S6.**

| Catalysts             | R1(Solution resistance) | R2(Polarization resistance) | $R_{ct} = R2-R1$ |
|-----------------------|-------------------------|-----------------------------|------------------|
| $\text{FeS}_2$        | 3.728                   | 55.2                        | 51.472           |
| $\text{CoS}_2$        | 5.2                     | 52.4                        | 47.2             |
| $\text{CoFe(1:1)S}_2$ | 3.5                     | 45.9                        | 42.4             |
| $\text{CoFe(2:1)S}_2$ | 2.1                     | 41.02                       | 38.92            |
| $\text{CoFe(3:1)S}_2$ | 1.0                     | 38.36                       | 37.36            |
| $\text{CoFe(1:3)S}_2$ | 4.45                    | 46.80                       | 42.35            |

### Electrochemical surface area (ECSA):

Electrochemical active sites closely interlinked with the superior performance of the electrode material. Therefore, determination of ECSA which is associated with the no of active sites gives us fruitful information regarding the superior performance of catalyst. ECSA was determined by performing the CV at various scan rates ( $10\text{-}300\text{ mVs}^{-1}$ ) in the non-faradic region from 0.0 V to 0.5 V. Afterward electrochemical double layer capacitance ( $C_{dl}$ ) was determined by plotting the average current density ( $(I_a+I_c)/2$ ) vs. scan rate. The ECSA is calculated by dividing this slope with specific capacitance ( $20\text{-}60\text{ }\mu\text{F cm}^{-2}$ ) of the flat standard surface, in the present study its value is considered to be  $40\text{ }\mu\text{F cm}^{-2}$ .<sup>1</sup> As shown in Fig. S8b, the ECSA value is highest for  $\text{CoFe(3:1)S}_2$ , confirming the high electrochemical activity of  $\text{CoFe(3:1)S}_2$  is due to large no. of exposed electrochemically active sites.



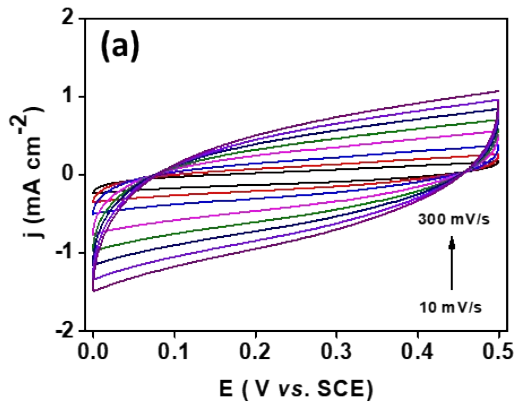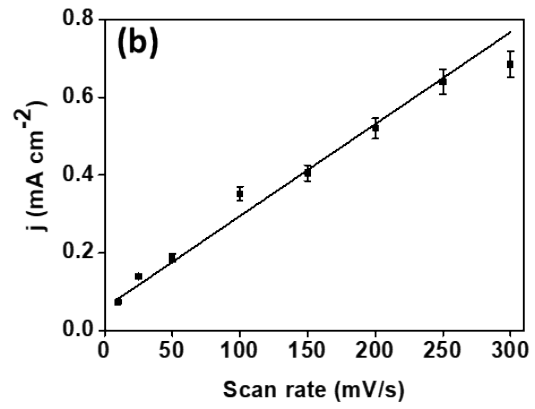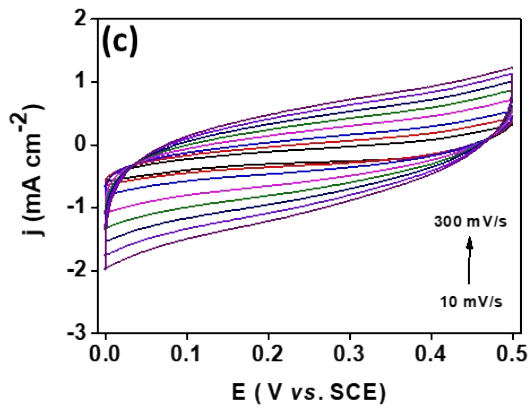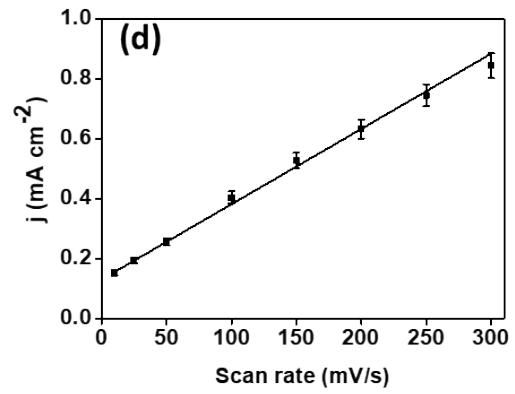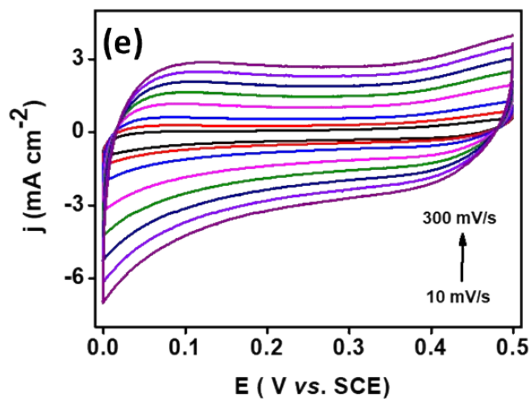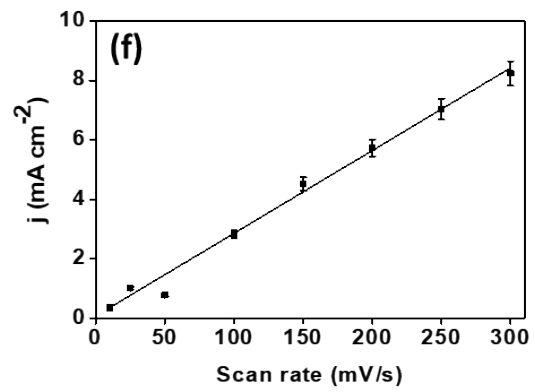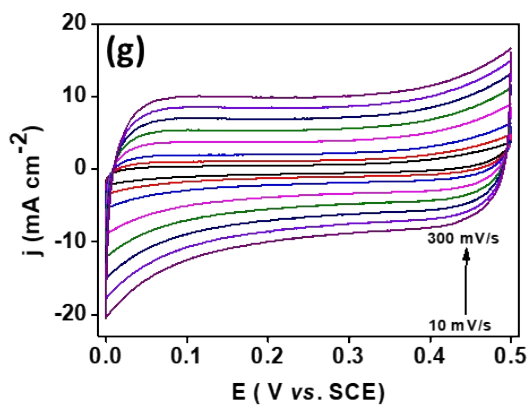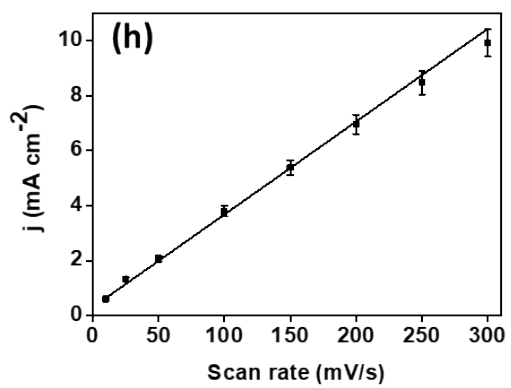

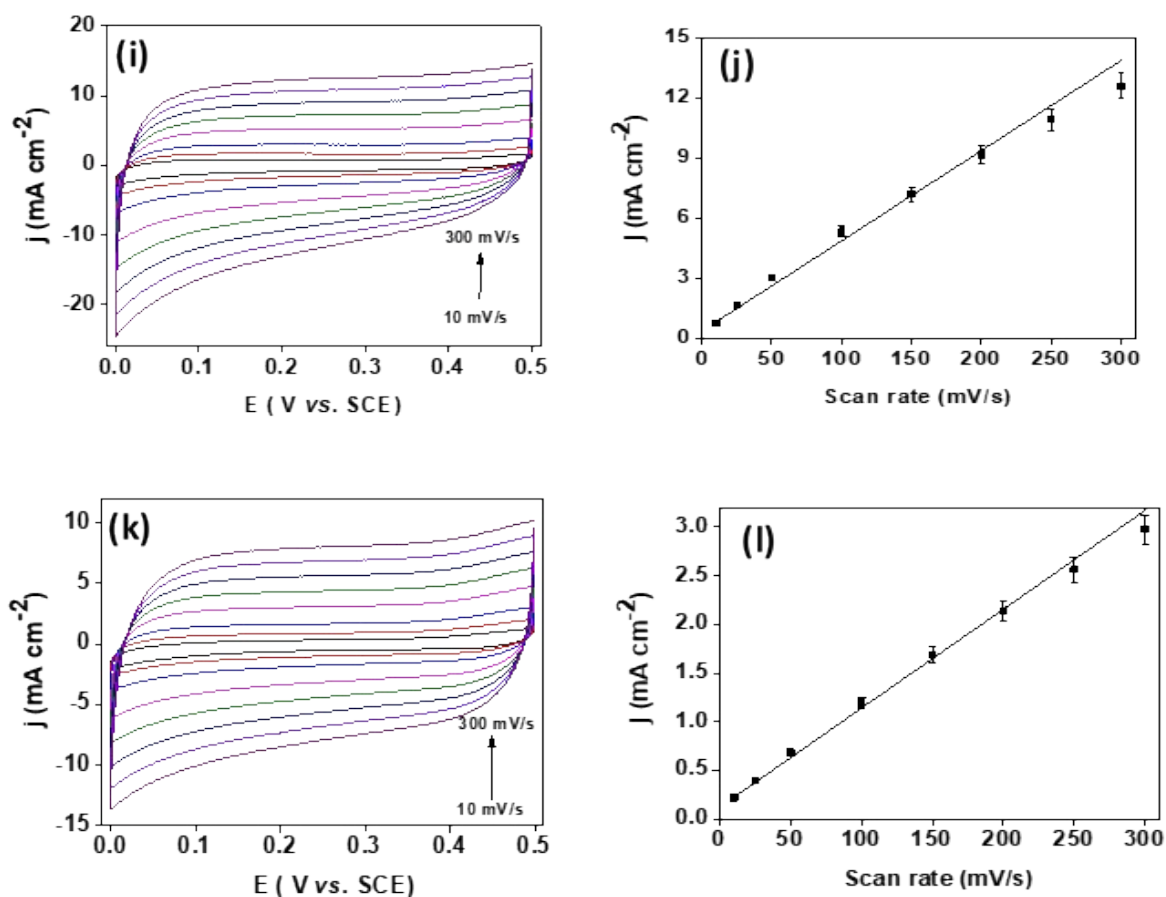

**Fig. S7.** CVs of (a) FeS<sub>2</sub>, (c) CoS<sub>2</sub>, (e) CoFe(1:1)S<sub>2</sub> (g) CoFe(2:1)S<sub>2</sub> (i) CoFe(3:1)S<sub>2</sub>, (k) CoFe(1:3)S<sub>2</sub> at various scan rates in the non-faradaic potential region and (b), (d), (f), (h), (j), (l) are corresponding average current versus scan rate plot in 0.5 M H<sub>2</sub>SO<sub>4</sub> electrolyte, CE: Pt wire, RE: SCE.

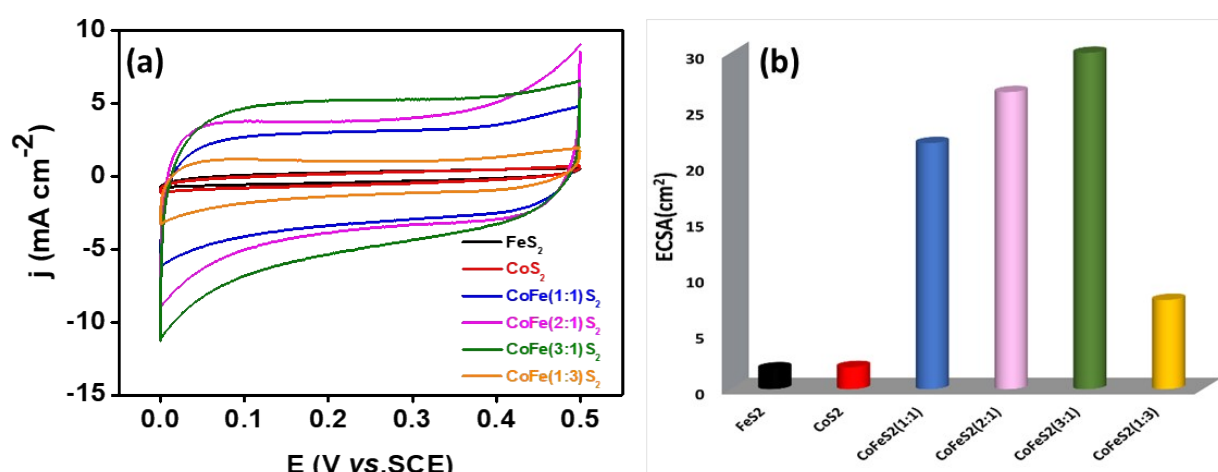

**Fig. S8.** (a) Comparative CVs at 100 mV s<sup>-1</sup> and (b) corresponding ECSA of various catalyst in 0.5 M H<sub>2</sub>SO<sub>4</sub> electrolyte, CE: Pt wire, RE: SCE.

### No. of electrochemical active sites by UPD method :

As shown in Fig. S9a initially CV scan was performed at  $2 \text{ mV s}^{-1}$  in  $0.5 \text{ M H}_2\text{SO}_4$  solution which showed no oxidation and reduction peak acts as a baseline. Afterward  $20 \text{ mM CuSO}_4$  was added to  $0.5 \text{ M H}_2\text{SO}_4$  and CV was performed under similar condition a clear distinguish peak for OPD, UPD and their stripping peaks can be observed clearly. Looking at CV for  $\text{CoFe}(3:1)\text{S}_2$  a series of LSV were carried out for stripping of Cu starting from different overpotential Fig. S9b. As shown in Fig. S9b flat region present at  $0.0165 \text{ C}$  (for  $\text{CoFe}(3:1)\text{S}_2$ ) between the  $0.205 \text{ V}$  to  $0.225 \text{ V}$  gives us a good measure to calculate the no. of active sites which further normalised with respect to geometric area of electrode ( $0.0314 \text{ cm}^2$ ). For comparison the no of sites for  $\text{CoS}_2$  and  $\text{FeS}_2$  were also calculated under similar condition following same procedure

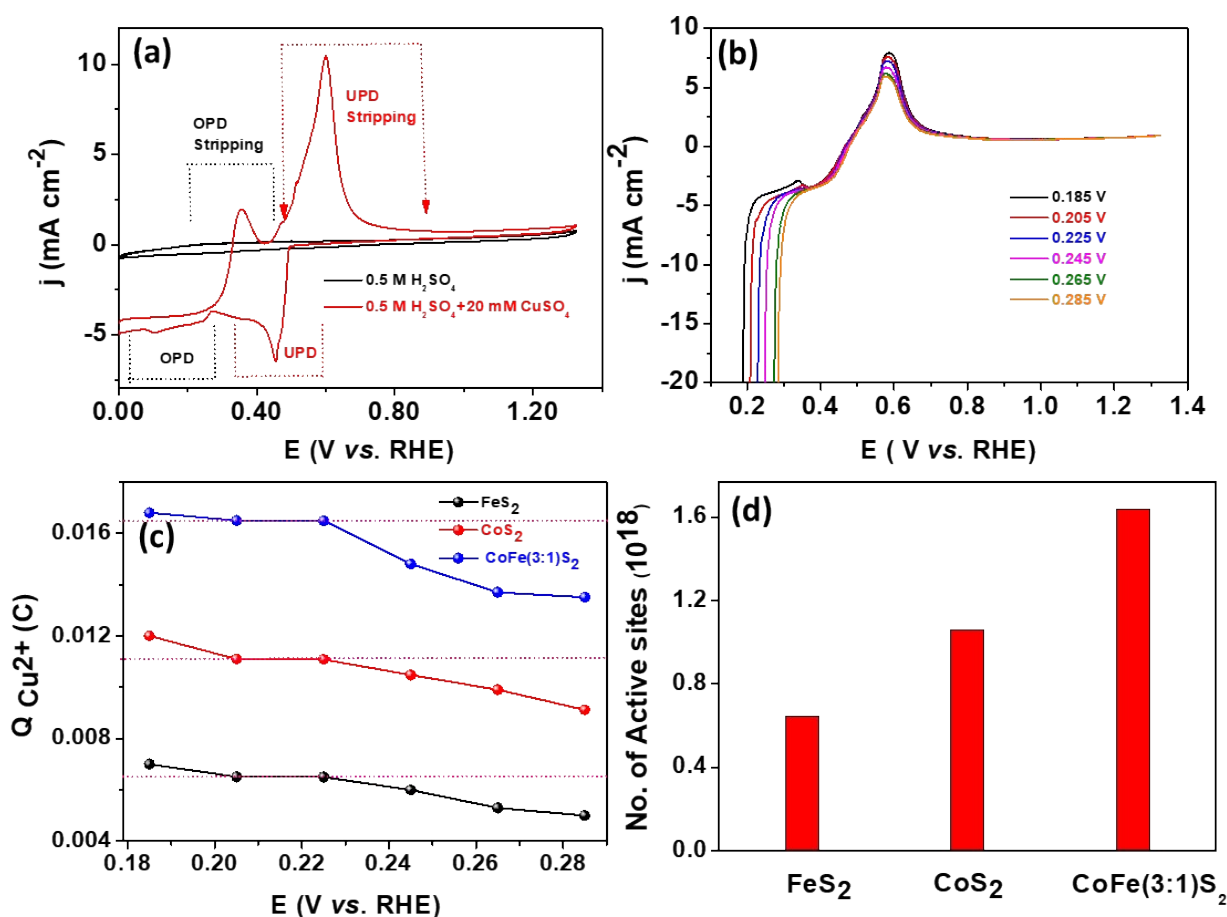

**Fig. S9.** (a) CVs of  $\text{CoFe}(3:1)\text{S}_2$  with and without  $\text{CuSO}_4$  (b) LSVs of  $\text{CoFe}(3:1)\text{S}_2$  under different starting voltages, (c) charges required to strip the Cu deposited at different underpotentials, (d) no. of active sites of various catalysts.



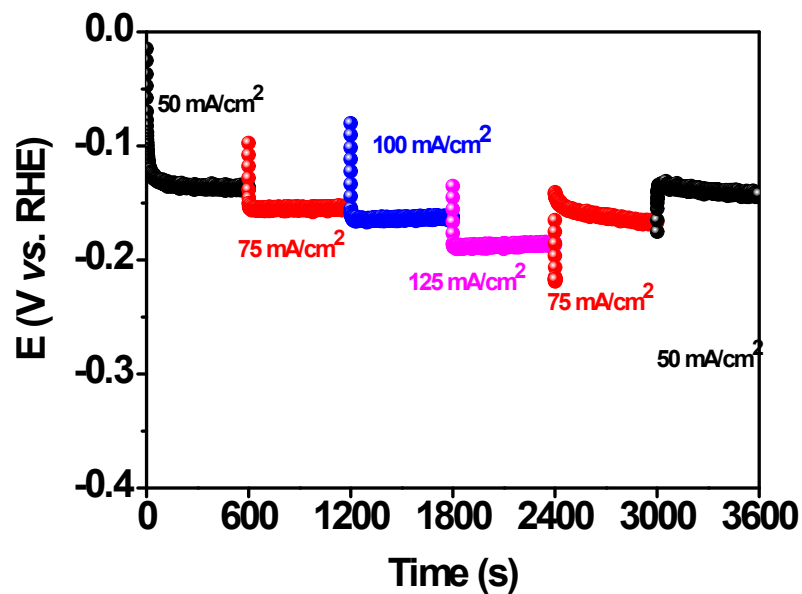

**Fig. S10.** Sequential chronopotentiometry study for CoFe(3:1)S<sub>2</sub> at various current density in 1 M KOH electrolyte, CE: Pt-wire, RE: Hg/HgO/1 M NaOH.

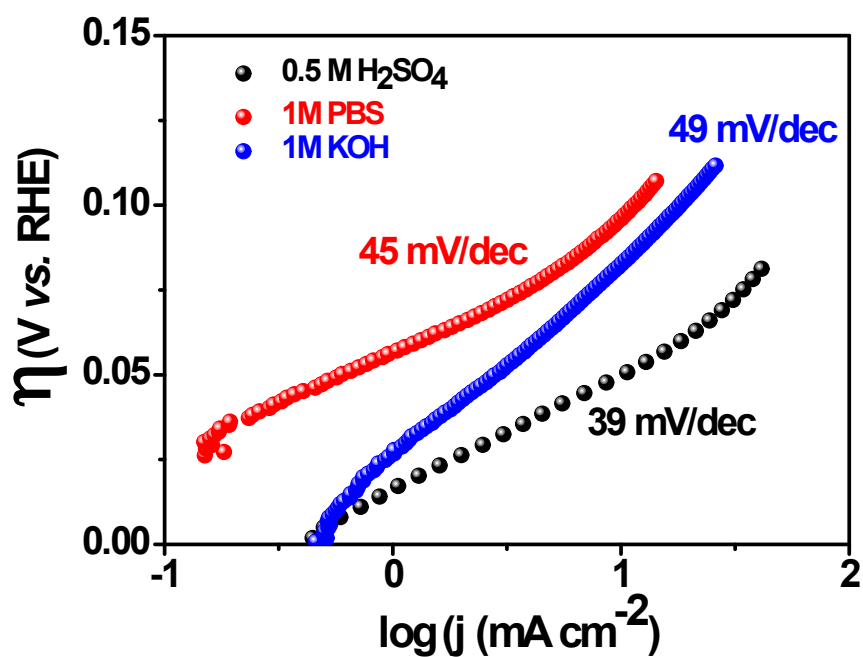

**Fig. S11.** Tafel plot of CoFe(3:1)S<sub>2</sub> in various electrolyte extracted from Fig. 2e (main manuscript).

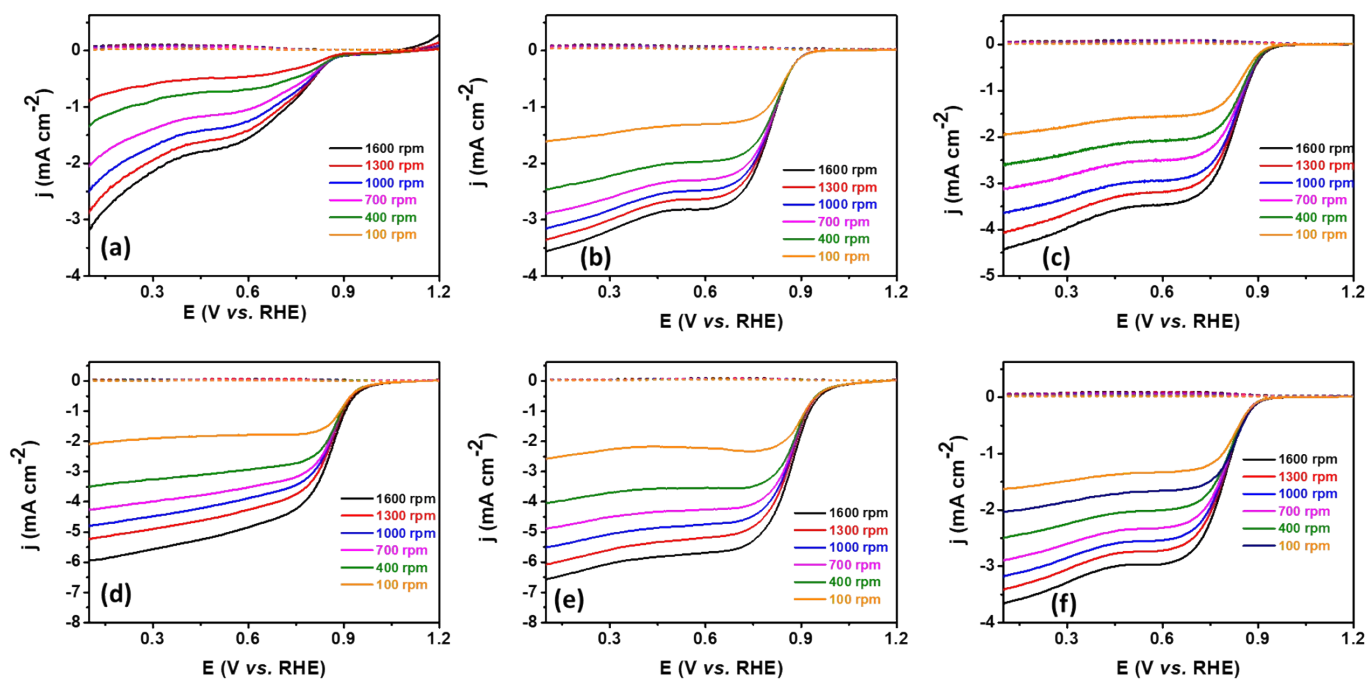

**Fig. S12.** RRDE Linear polarization curves for (a) FeS<sub>2</sub>, (b) CoS<sub>2</sub>, (c) CoFe(1:1)S<sub>2</sub>, (d) CoFe(2:1)S<sub>2</sub>, (e) CoFe(3:1)S<sub>2</sub>, and (f) CoFe(1:3)S<sub>2</sub> at varying rotation rates in 0.1 M KOH at a scan rate of 5 mV s<sup>-1</sup>. CE: Pt-wire; RE: Hg/HgO/1 M NaOH.

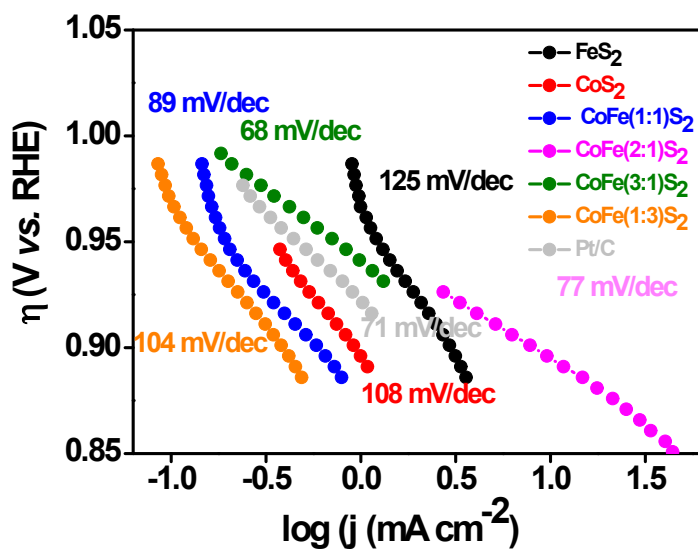

**Fig. S13.** Tafel plot of various catalysts extracted from Fig. 3b (main manuscript).

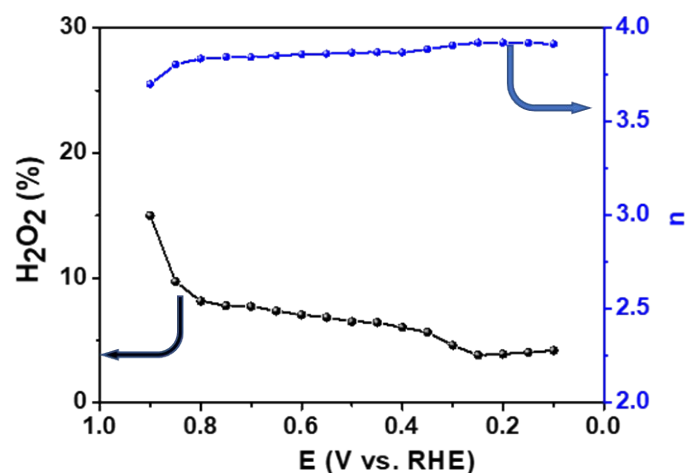

**Fig. S14.** No. of electron and amount of  $\text{H}_2\text{O}_2$  produced at various potentials for  $\text{CoFe}(3:1)\text{S}_2$ .

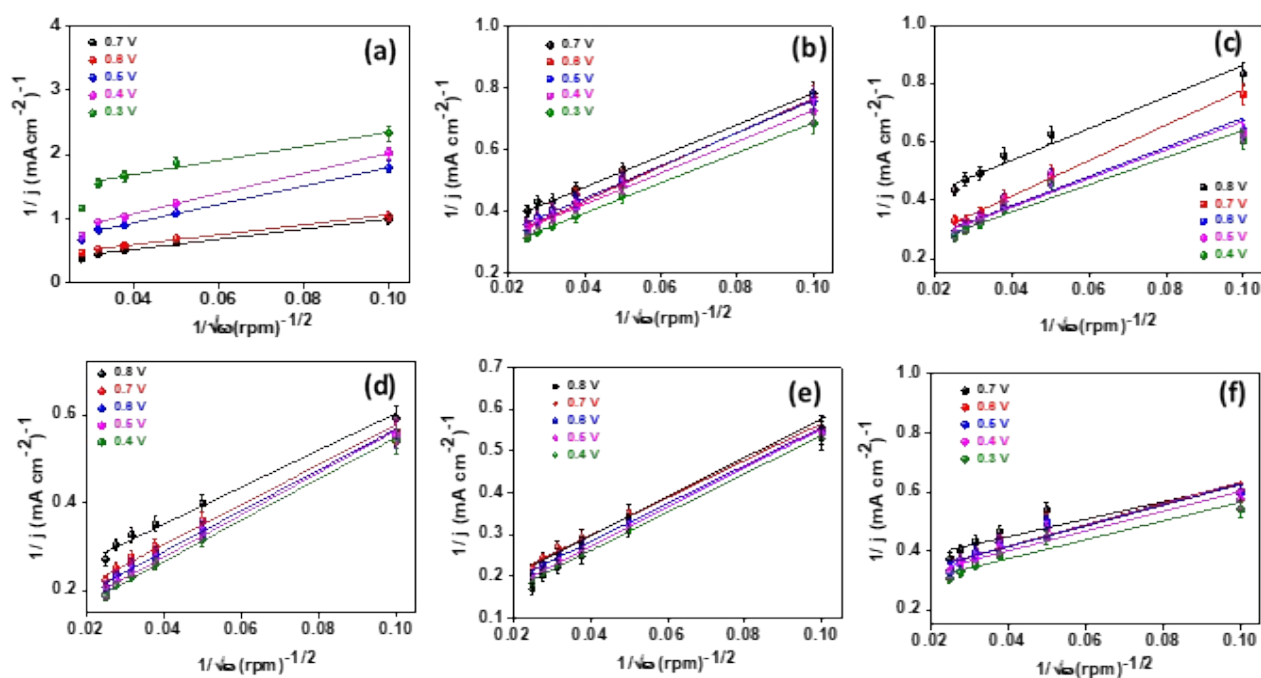

**Fig. S15.** Koutecky-Levich (K-L) plot for (a)  $\text{FeS}_2$ , (b)  $\text{CoS}_2$ , (c)  $\text{CoFe}(1:1)\text{S}_2$ , (d)  $\text{CoFe}(2:1)\text{S}_2$ , (e)  $\text{CoFe}(3:1)\text{S}_2$ , and (f)  $\text{CoFe}(1:3)\text{S}_2$  at various potential extracted from the linear polarisation curve at various rotation rates in 0.1 M KOH at a scan rate of  $5 \text{ mV s}^{-1}$ . CE: Pt-wire; RE: Hg/HgO/1 M NaOH.

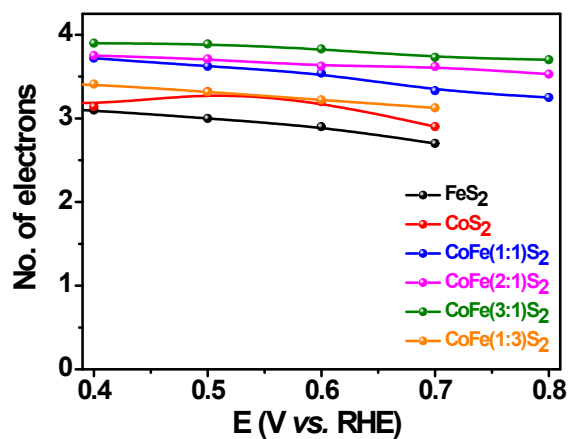

**Fig. S16.** Potential dependent number of electron extracted from RDE plot in 0.1 M KOH at a scan rate of  $5 \text{ mV s}^{-1}$ . CE: Pt wire; RE: Hg/HgO/1 M NaOH.

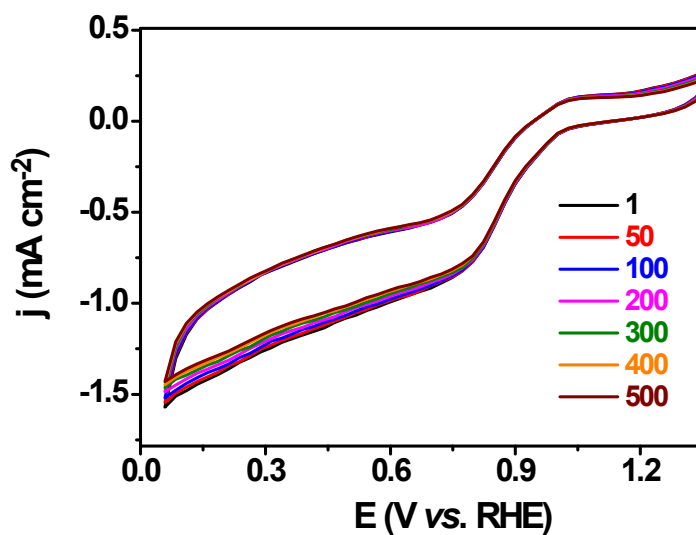

**Fig. S17.** CVs for CoFe(3:1)S<sub>2</sub> in oxygen saturated 0.1 M KOH upto 500 cycles at a scan rate of  $25 \text{ mV s}^{-1}$  CE: Pt wire, RE: Hg/HgO/1 M NaOH.

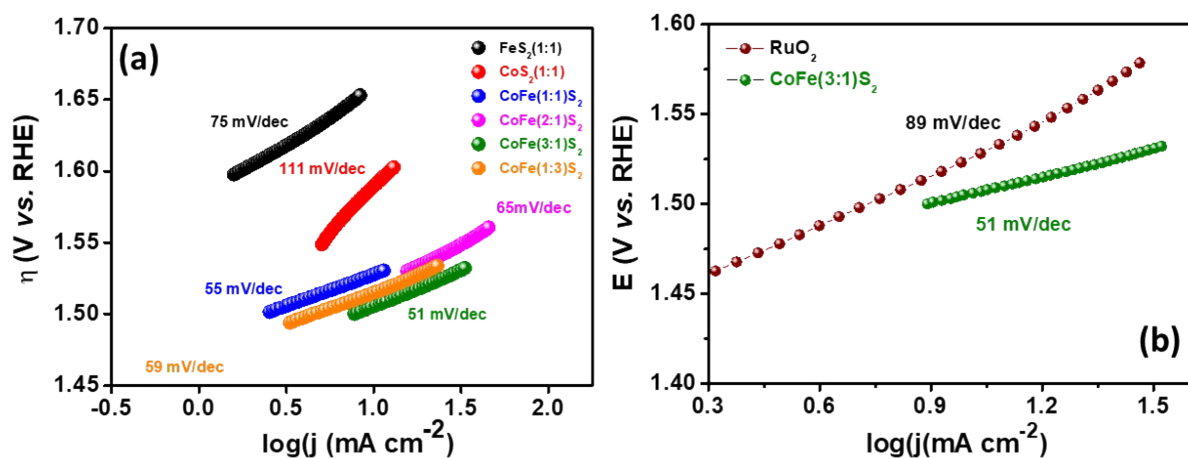

**Fig. S18.** (a) and (b) are the Tafel plot extracted from linear polarisation curves of Fig. 6a main graph recorded in 0.1 M KOH at a scan rate of 5 mV s<sup>-1</sup>, CE: Pt wire, RE: Hg/HgO/1 M NaOH

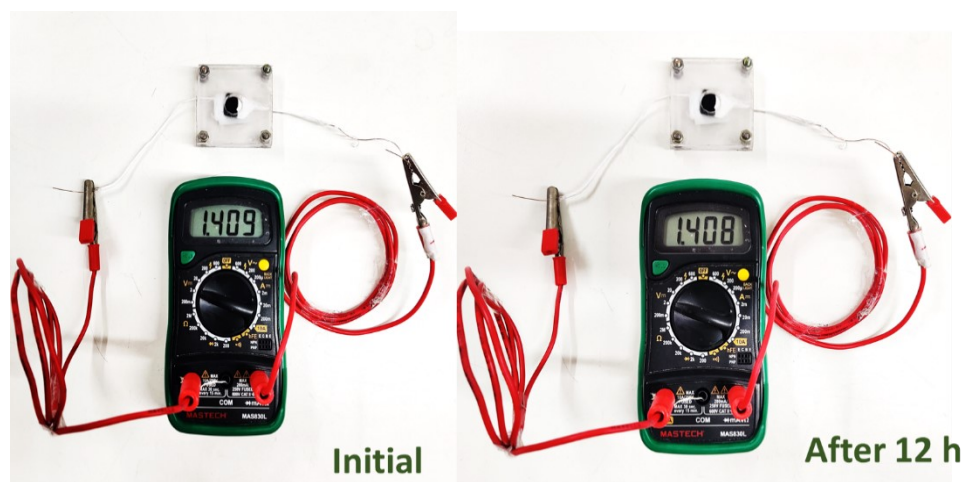

**Fig. S19.** Photographs of the OCP recorded for a Zn-air battery assembled with CoFe(3:1)S<sub>2</sub> air cathode by a multimeter before and after 12 h.

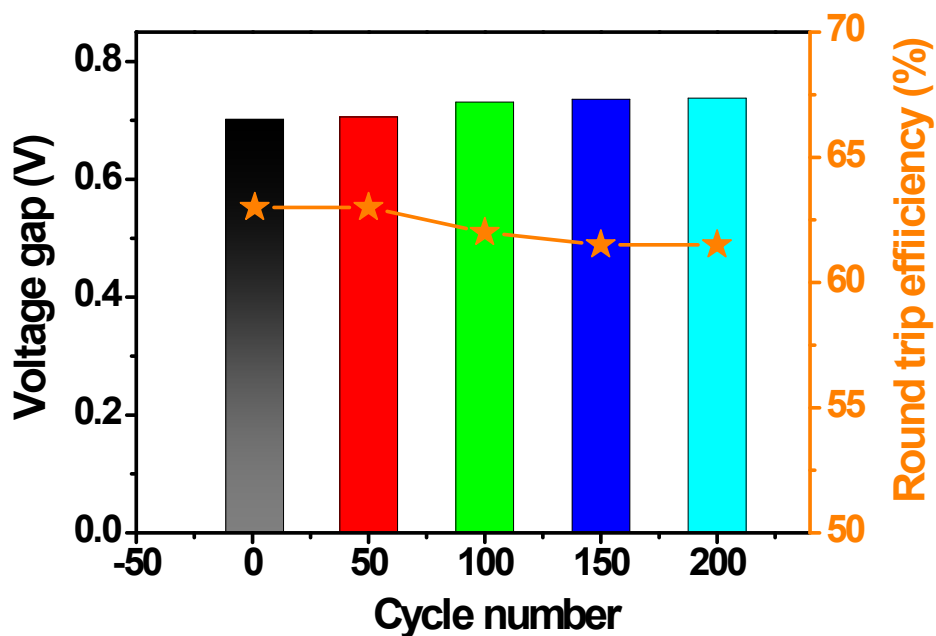

**Fig. S20.** Bar diagram showing the voltage gap and round trip efficiency (%) recorded during the stability study of a Zn-air battery assembled using CoFe(3:1)S<sub>2</sub> air cathode for 210 cycles.

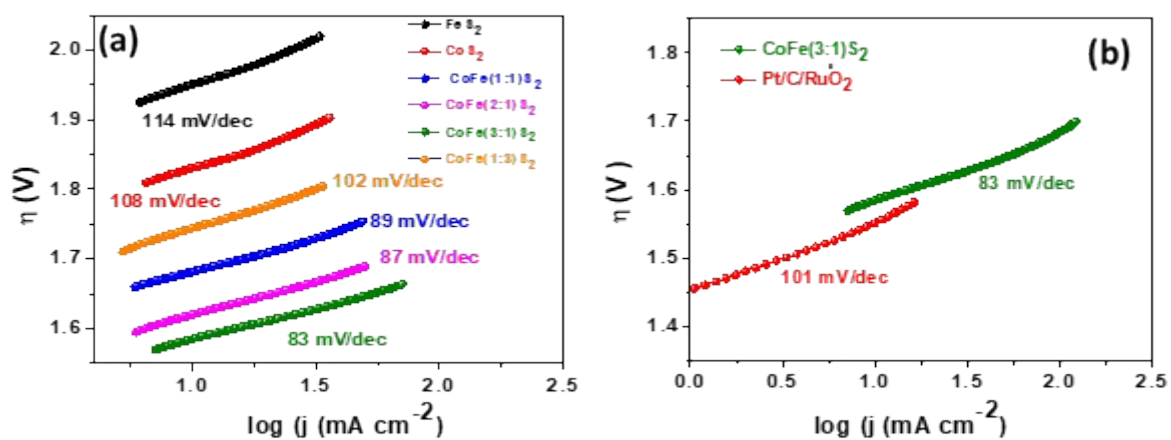

**Fig. S21.** (a) and (b) are the Tafel plot extracted from linear polarisation curves of Fig. 6a main graph recorded in 1 M KOH at a scan rate of 5 mV s<sup>-1</sup>, CE: Pt wire, RE: Hg/HgO/1 M NaOH

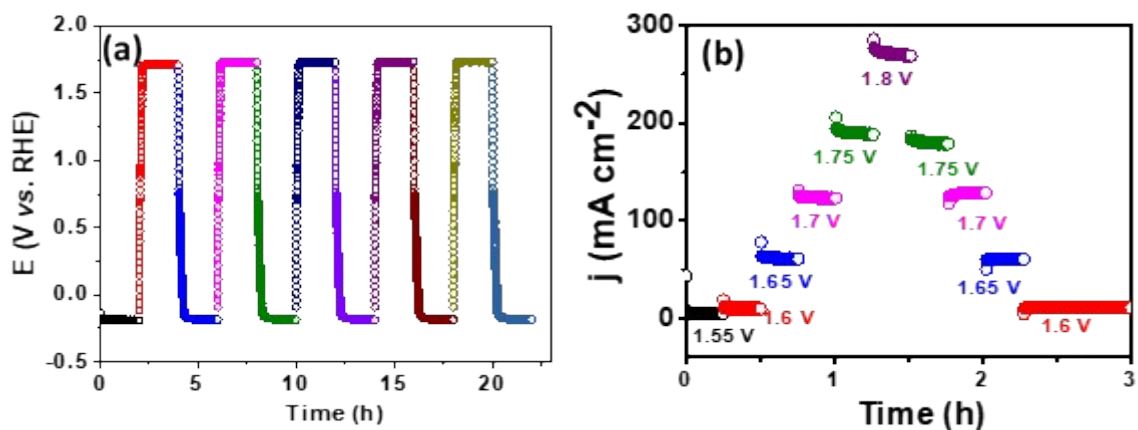

**Fig. S22.** (a) Chronopotentiometric curve of water splitting device recorded at  $100 \text{ mA cm}^{-2}$  for OER and  $-100 \text{ mA cm}^{-2}$  for HER in three electrode system where the polarity of a device was reverse after 30 minutes, (b) multistep chronoamperometric curve of a water splitting device recorded by sweeping the potential from 1.55 V to 1.8 V.

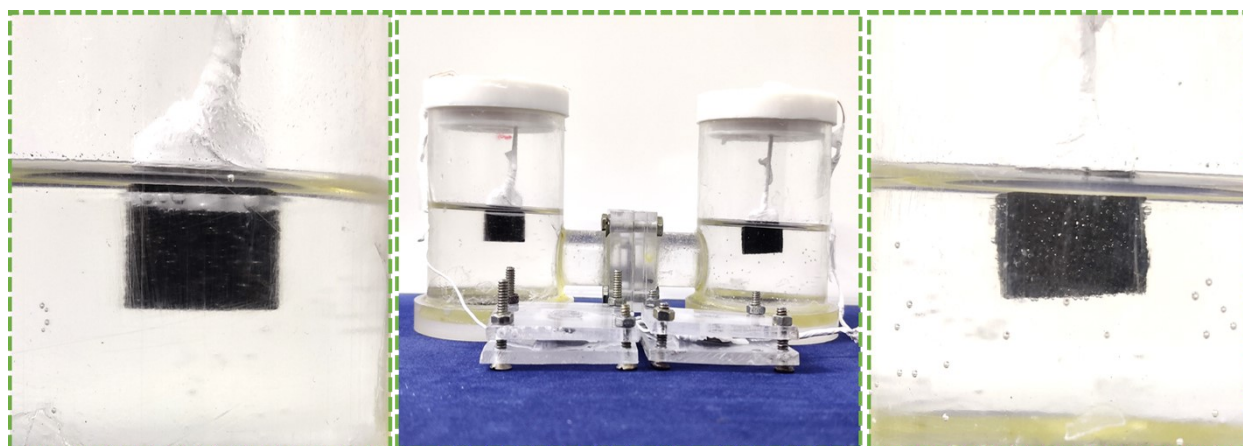

**Fig. S23.** (a) Photograph of overall water splitting driven by two Zn-air batteries assembled in a series using  $\text{CoFe}(3:1)\text{S}_2$  air cathode.

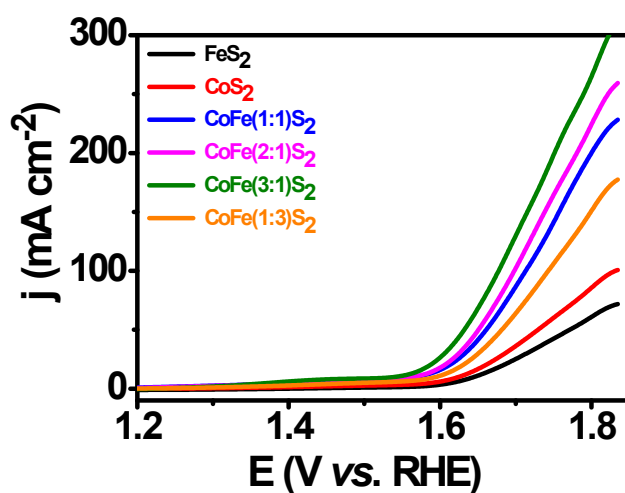

**Fig. S24** LSVs of various catalysts in 0.5 M H<sub>2</sub>SO<sub>4</sub> at 5 mV s<sup>-1</sup> representing the OER activity of various catalysts,

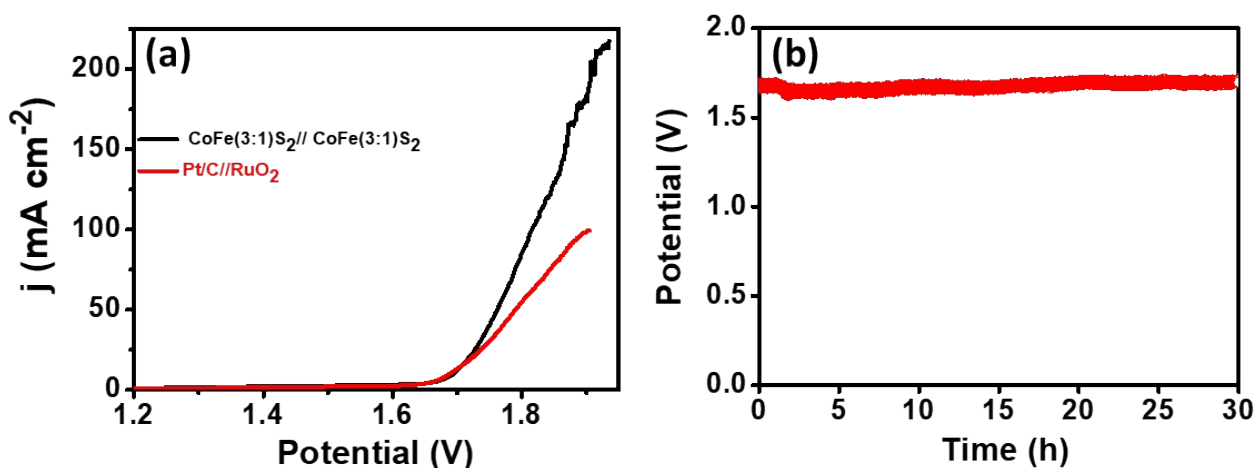

**Fig. S25.** (a) Comparative LSVs of CoFe(3:1)S<sub>2</sub> with state of art catalyst for water splitting at 5 mV s<sup>-1</sup>, (b) chronopotentiometric curve recorded at 10 mA cm<sup>-2</sup> for CoFe(3:1)S<sub>2</sub> under overall water splitting in 0.5 M H<sub>2</sub>SO<sub>4</sub>.



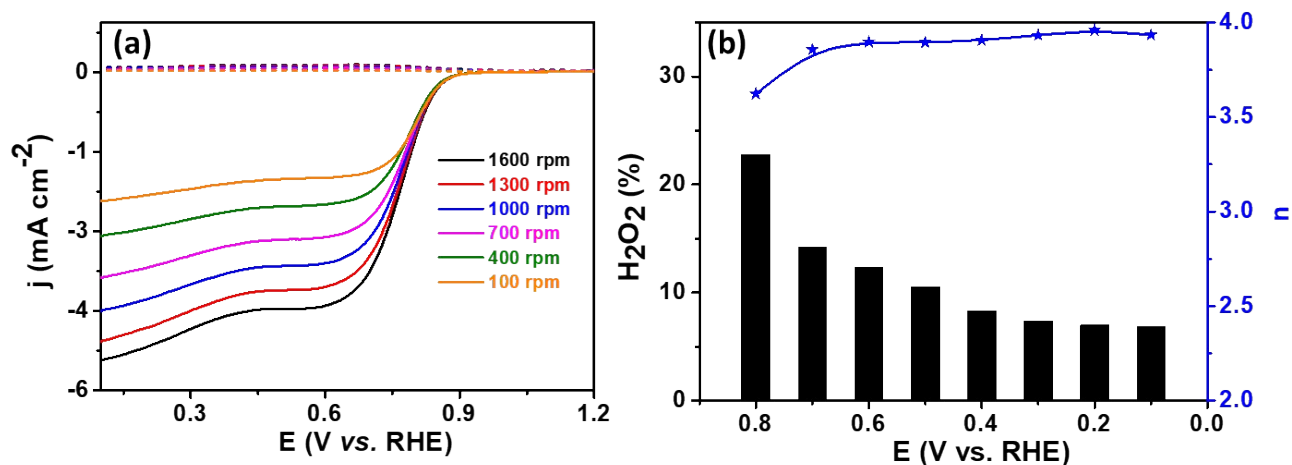

**Fig. S26.** (a) RRDE polarization curves at 5 mV s<sup>-1</sup> at various rotation rates, (b) bar diagram representing the no. of electron and % of H<sub>2</sub>O<sub>2</sub> at various potentials at 1600 rpm.

All the catalysts show good OER activity validated from the steep increase in the current density. But among all the catalyst CoFe(3:1)S<sub>2</sub> demonstrate the highest OER activity with a low overpotential of 306 mV@10 mA cm<sup>-2</sup> and achieved a high current density of 303 mA cm<sup>-2</sup>@1.83 V. When CoFe(3:1)S<sub>2</sub> is equipped in water electrolyser, both as anode and cathode reaches a cell voltage of 10 mA cm<sup>-2</sup> at 1.68 V which is comparable to the benchmark catalysts. Besides, the catalyst also exhibits a good cycling stability indicated by the stable potential response for 30 h at a constant current density of 10 mA cm<sup>-2</sup>.

Further, the catalyst also shows a good ORR activity in 0.5 M H<sub>2</sub>SO<sub>4</sub> with a very good onset potential of 0.92 V vs. RHE and a half-wave potential of 0.77 V vs. RHE. The no. of electron was close to the ideal 4 electron and H<sub>2</sub>O<sub>2</sub> % was close to 10 %.

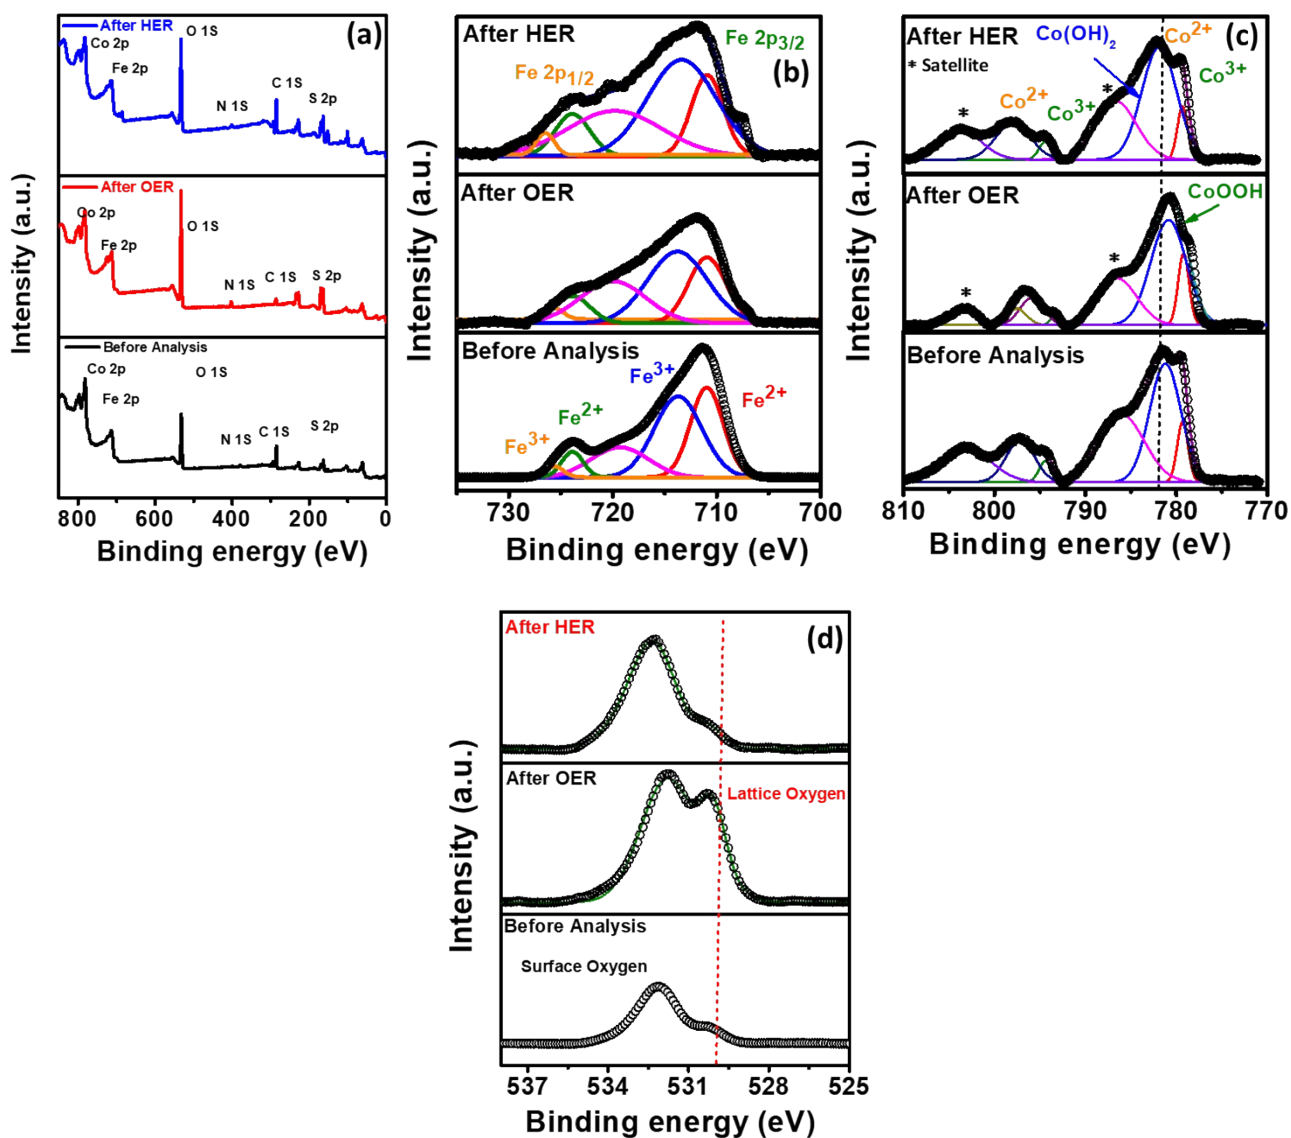

**Fig. S27.** (a) Survey spectrum and deconvoluted XP spectra of, (b) Fe 2p, (c) Co 2p and (d) O 1s of CoFe(3:1)S<sub>2</sub> before and after HER and OER.

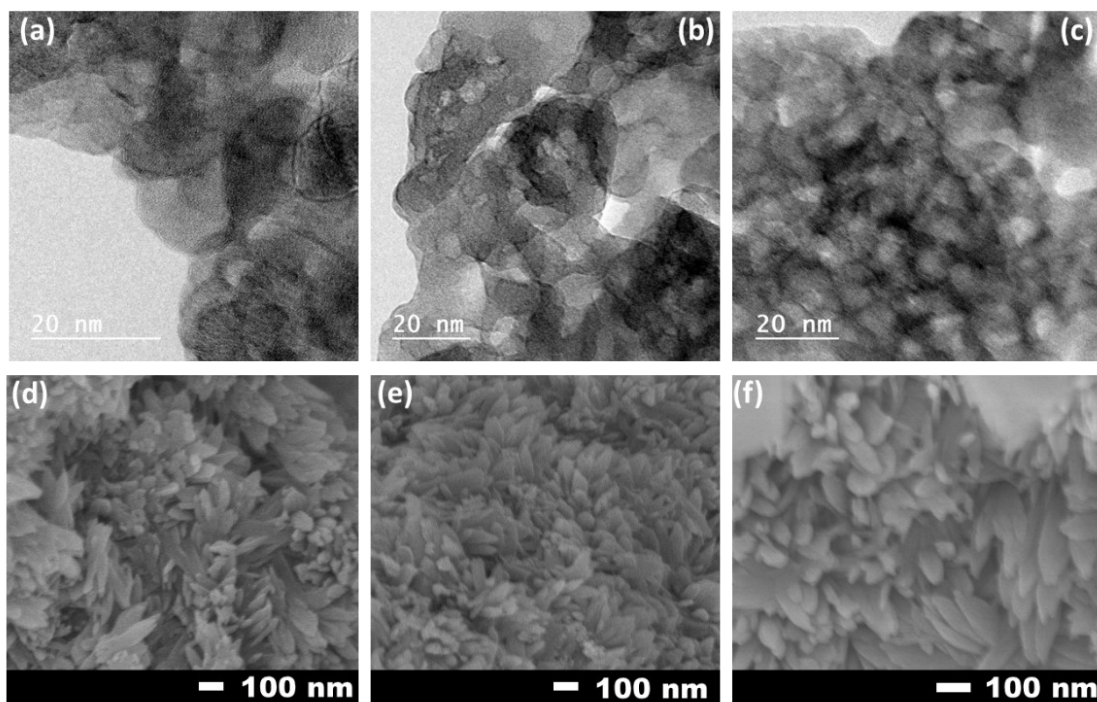

**Fig. S28.** TEM and SEM images of  $\text{CoFe}(3:1)\text{S}_2$  after (a) & (d) after HER, (b) & (e) after OER in 1 M KOH and (c) & (f) after ORR in 0.1 M KOH.

**Table S2:** Literature reports showing the self powered water splitting with Zn air batteries:

| Catalyst                                                  | $\eta$ @10 mA cm <sup>-2</sup> in 1.0 M KOH (V) |                                                                                                      | E <sub>1/2</sub> ORR (V) | $\Delta E$ (V) | $\Delta E$ cell (V) | pH universal HER activity | Zn-Air battery                       |                                          | Ref              |
|-----------------------------------------------------------|-------------------------------------------------|------------------------------------------------------------------------------------------------------|--------------------------|----------------|---------------------|---------------------------|--------------------------------------|------------------------------------------|------------------|
|                                                           | OER                                             | HER                                                                                                  |                          |                |                     |                           | Power density (mW cm <sup>-2</sup> ) | Specific capacity (mAh g <sup>-1</sup> ) |                  |
| C <sub>60</sub> -SWCNT                                    | 0.46                                            | <b>0.38 (0.1 KOH)</b><br><b>0.33(PBS)</b><br><b>0.32 (0.5 M H<sub>2</sub>SO<sub>4</sub>)</b>         | 0.79                     | 0.77           | 1.68                | yes                       | NA                                   | NA                                       | 2                |
| FeCo/Co <sub>2</sub> P                                    | 0.28                                            | 0.26                                                                                                 | 0.79                     | 0.77           | 1.68                | No                        | 154                                  |                                          | 3                |
| CoSA/N,S-HCS                                              | 0.31                                            | 0.17                                                                                                 | 0.85                     | 0.67           | 1.64                | No                        | 173                                  | 781                                      | 4                |
| Ni <sub>0.5</sub> Fe <sub>0.5</sub> @NG                   | 0.21                                            | 0.35                                                                                                 | 0.83                     | 0.61           | 1.69                | No                        | 85                                   | 765                                      | 5                |
| NiS <sub>2</sub> /CoS <sub>2</sub> -O NWs                 | 0.24                                            | 0.18                                                                                                 | 0.70                     |                | 1.77                | No                        |                                      |                                          | 6                |
| CoN <sub>x</sub> /NGA                                     | 0.3                                             | 198                                                                                                  | 0.83                     | 0.70           | 1.71                | No                        |                                      | 638                                      | 7                |
| NiFe/NCNF/CC                                              | 0.26                                            |                                                                                                      | 0.79                     | 0.70           | 2.05                | No                        | 141                                  | 640                                      | 8                |
| CoO <sub>x</sub> @NOC                                     | 0.32                                            | 0.25                                                                                                 | 0.86                     | 0.69           | 1.51                | No                        | 141.65                               | 757                                      | 9                |
| RuCo/NPC                                                  | 0.35                                            | 0.21                                                                                                 | 0.80                     | 0.79           | 1.68                | No                        | 79.4                                 | 1089                                     | 10               |
| CoSA + Co <sub>9</sub> S <sub>8</sub> /HCNT               | 0.33                                            | 0.25                                                                                                 | 0.85                     | 0.75           | 1.59                | No                        | 177                                  | 788                                      | 11               |
| Ni <sub>1.9</sub> FeS <sub>1.09</sub> (OH) <sub>4.6</sub> | 0.20                                            | 0.28@ 80 mA cm <sup>-2</sup>                                                                         |                          |                | 1.62                | No                        | 248                                  |                                          | 12               |
| Cu-N-SC-1100                                              | 0.33                                            | 0.17                                                                                                 | 0.89                     | 0.67           | 1.68                | No                        | 198                                  | 732                                      | 13               |
| CoFe@NO -CNT                                              | 0.16                                            | 0.13                                                                                                 | 0.84                     | 0.73           | 1.57                | No                        | 142                                  | 819                                      | 14               |
| N, Co-CNTs                                                | 0.30                                            | 0.20                                                                                                 | 0.85                     |                | 1.69                | No                        | 114                                  |                                          | 15               |
| CoP@PNC-Do                                                | 0.32                                            | 0.17 (1 M KOH)<br>0.16 (0.5M H <sub>2</sub> SO <sub>4</sub> )                                        | 0.80                     |                | 1.74                |                           | 138                                  | 730                                      | 16               |
| <b>CoFe(3:1)S<sub>2</sub></b><br><br><b>Our work</b>      | <b>0.25</b>                                     | <b>0.117 1 M KOH</b><br><br><b>0.12 1 M PBS</b><br><br><b>0.98 0.5 M H<sub>2</sub>SO<sub>4</sub></b> | <b>0.87</b>              | <b>0.61</b>    | <b>1.58</b>         | <b>Yes</b>                | <b>387</b>                           | <b>841</b>                               | <b>This Work</b> |

## References:

1. N. Thakur, M. Kumar, S. D. Adhikary, D. Mandal and T. C. Nagaiah, *Chem. Commun.*, 2019, **55**, 5021-5024.
2. R. Gao, Q. Dai, F. Du, D. Yan and L. Dai, *J. Am. Chem. Soc.*, 2019, **141**, 11658-11666.
3. Q. Shi, Q. Liu, Y. Ma, Z. Fang, Z. Liang, G. Shao, B. Tang, W. Yang, L. Qin and X. Fang, *Adv. Energy Mater.*, 2020, **10**, 1903854.
4. Z. Zhang, X. Zhao, S. Xi, L. Zhang, Z. Chen, Z. Zeng, M. Huang, H. Yang, B. Liu and S. J. Pennycook, *Adv. Energy Mater.*, 2020, **10**, 2002896.
5. P. Liu, D. Gao, W. Xiao, L. Ma, K. Sun, P. Xi, D. Xue and J. Wang, *Adv. Funct. Mater.*, 2018, **28**, 1706928.
6. J. Yin, Y. Li, F. Lv, M. Lu, K. Sun, W. Wang, L. Wang, F. Cheng, Y. Li and P. Xi, *Adv. Mat.*, 2017, **29**, 1704681.
7. H. Zou, G. Li, L. Duan, Z. Kou and J. Wang, *Appl. Catal. B: Environ.*, 2019, **259**, 118100.
8. C. Lai, J. Fang, X. Liu, M. Gong, T. Zhao, T. Shen, K. Wang, K. Jiang and D. Wang, *Appl. Catal. B: Environ.*, 2021, **285**, 119856.
9. M. E. Hilal, H. A. Younus, S. Chaemchuen, S. Dekyvere, X. Zen, D. He, J. Park, T. Han and F. Verpoort, *Catal. Sci. Technol.*, 2021.
10. Y. Pei, W. He, M. Wang, J. Wang, T. Sun, L. Hu, J. Zhu, Y. Tan and J. Wang, *Chem. Commun.*, 2021, **57**, 1498-1501.
11. Y. Li, R. Cao, L. Li, X. Tang, T. Chu, B. Huang, K. Yuan and Y. Chen, *Small*, 2020, **16**, 1906735.
12. B. Wang, C. Tang, H. F. Wang, B. Q. Li, X. Cui and Q. Zhang, *Small Methods*, 2018, **2**, 1800055.
13. M. Wang, K. Su, M. Zhang, X. Du and Z. Li, *ACS Sustain. Chem. Eng.*, 2021.
14. M. Li, S. Chen, B. Li, Y. Huang, X. Lv, P. Sun, L. Fang and X. Sun, *Electrochim. Acta*, 2021, **388**, 138587.
15. Q. Jin, B. Ren, H. Cui and C. Wang, *Appl. Catal. B*, 2021, **283**, 119643.
16. Y. Li, Y. Liu, Q. Qian, G. Wang and G. Zhang, *Energy Storage Mater.*, 2020, **28**, 27-36.
